# Supplementary material for: Diastereomeric excess upon cleavage and reformation of diastereomeric alkoxyamines
Source: Royal Society of Chemistry journal article supplement (doi:10.1039/b313990e), 2004-01-01
Supplement: b313990e.doc [file b313990e.doc]

Diastereomeric excess upon cleavage and reformation of diastereomeric alkoxyamines

Gennady Ananchenko,**a* Sylvain Marque,*b* Didier Gigmes, *b* Denis Bertin*b* and Paul Tordo*b*

a Physikalisch-Chemisches Institut, Universität Zürich, Winterthurerstrasse 190, 8057 Zürich, Switzerland

b Laboratoire Structure et Réactivité des Espèces Paramagnétiques, UMR 6517, CNRS et Universités d’Aix-Marseille 1 et 3, 13397 Marseille Cedex 20, France

Supplementary data

Experimental procedures for the synthesis of 1a-b, 2a-c and 3.

Synthesis of 1a

*sec-Butyl 2-(2,2,6,6-tetramethylpiperidin-1-yloxy)propionate* (**1a**) was synthesized from *sec-butyl 2-bromopropionate*1 according to general method published in 2. Diastereomers were enriched by chromatography on neutral alumina with hexane / ether, 7/3 as eluent. Diastereomeric purity of each isomer was ca. 65% by NMR. Diastereomer 1, 1H-NMR, CDCl3, 300 MHz, : 4.93 – 4.83m (1H, O-C*H*MeEt); 4.30q (1H, J=7.0 Hz, C*H*ON); 1.70 – 1.35br (2CH3 and 2CH2) and 1.31 – 1.0br (16H, 4CH3 and 2CH2); 0.91t (3H, J=7.0 Hz, CH2C*H*3). 13C-NMR, CDCl3, 75 MHz,: 174.0 (CO); 82.03 (CH-ON); 72.29 (O-*C*HMeEt); 59.75 and 59.54 (C-2,6 of piperidine); 40.39 (C-3,5 of piperidine); 33.77, 33.27 and 20.13 (4CH3 in TEMPO); 28.73 (CH2); 17.13 (C-4 of piperidine); 19.39 (CH3), 18.60 (CH3); 9.74 (CH2*C*H3). Diastereomer 2, 1H-NMR, CDCl3, 300 MHz, : 4.91 – 4.81m (1H, O-C*H*MeEt); 4.34q (1H, J=7 Hz, C*H*ON); 1.70 – 1.35br (2CH3 and 2CH2) and 1.31 – 1.0br (16H, 4CH3 and 2CH2); 0.91t (3H, J=7 Hz, CH2CH3). 13C-NMR, CDCl3, 75 MHz,: 173.86 (CO); 81.98 (CH-ON); 72.23 (O-*C*HMeEt); 59.76 and 59.53 (C-2,6 of piperidine); 40.38 (C-3,5 of piperidine); 33.77, 33.27 and 20.13 (4CH3 in TEMPO); 28.73 (CH2); 17.13 (C-4 of piperidine); 19.20 (CH3), 18.49 (CH3); 9.65 (CH2*C*H3).

Synthesis of 1b

*Methyl 2-bromo-3-methoxybutyrate* was synthesized by bromination of methyl crotonate3 followed by reaction with sodium methoxide4.

*Methyl 3-methoxy-2-(2,2,6,6-tetramethylpiperidin-1-yloxy) butyrate* (**1b**). A solution of 0.693 g (4 mmol) of PMDETA in 20 ml of acetone was bubbled by Ar within 30 min and transferred by syringe to a flask containing 0.574 g (4 mmol) of CuBr and purged by Ar. After the Cu complex was formed and solution became homogeneous, it was transferred to a degassed mixture of 0.211 g (1 mmol) of methyl 2-bromo-3-methoxybutyrate, 0.125 g (0.8 mmol) of TEMPO, and 0.064 g (1 mmol) of Cu in 5 ml of acetone. The mixture was stirred for 18 hr in Ar atmosphere at 55 °C. Thereafter, the mixture was exposed on an open air for 30 min, diluted by 50 ml of a mixture of ether+hexane, 1/2; and precipitate of Cu complex was filtered off. The solution was passed though a small column of silica gel with ether + hexane, 1/5 as eluent. Evaporation of the solvents in high vacuum gave 0.160 g (70 %) of the targeted product as a colorless oil, which consisted from two diastereomers, 44/56. Diastereomers were enriched by chromatography on neutral alumina with hexane / ether, 4/1 as eluent. Diastereomeric purity of each isomer was 82% by NMR. Diastereomer 1 (first product from the column), 1H-NMR, CDCl3, 600 MHz, : 4.47d (1H, J=6.7 Hz, CH-ON); 3.76p (1H, J=6.7 Hz, C*H*OCH3); 3.67s (3H, COOC*H*3); 3.37s (3H, OCH3); 1.19d (3H, J=6.7 Hz, CH3); 1.40br and 1.25 – 0.9br (18H, 4CH3 and 3CH2). 13C-NMR, CDCl3, 151 MHz,: 171.75 (CO); 85.78 (CH-ON); 76.27 (*C*H-OCH3); 60.65 and 59.67 (C-2,6 of piperidine); 57.38 (OCH3); 51.20 (COO*C*H3); 40.34 (C-3,5 of piperidine); 33.36, 32.90 and 20.27 (4CH3 in TEMPO); 17.05 (C-4 of piperidine); 14.71 (CH3). Diastereomer 2, (second product from the column), 1H-NMR, CDCl3, 200 MHz,: 4.27d (1H, J=4.7 Hz, CH-ON); 3.72dq (1H, J=4.7 Hz, 6.5 Hz C*H*OCH3); 3.69s (3H, COOCH3); 3.34s (3H, OCH3); 1.25d (3H, J=6.5 Hz, CH3); 1.50br, 1.40br and 1.25 – 0.9br (18H, 4CH3 and 3CH2). 13C-NMR, CDCl3, 151 MHz,: 171.75 (CO); 88.51 (CH-ON); 77.74 (*C*H-OCH3); 60.53 and 59.52 (C-2,6 of piperidine); 57.42 (OCH3); 51.29 (COO*C*H3); 40.52 (C-3,5 of piperidine); 33.80, 32.83 and 20.13 (4CH3 in TEMPO); 17.01 (C-4 of piperidine); 16.88 (CH3).

Synthesis of 2a

*3-Ethylpent-3-yl 2-bromopropionate.* 4.14 g (0.024 mol) of 2-bromopropionylchloride in 5 ml of ether were slowly added to a mixture of 6.97 g (0.06 mol) of 3-ethyl-3-pentanol and 4.86 g (0.048 mol) of triethylamine in 10 ml of ether in N2 atmosphere under stirring at 0 °C. After addition completed the mixture was refluxed for 20 hrs. Then, 50 ml of water were added, organic layer was separated, and water layer was 3 times extracted by ether. Ether extracts were combined, washed with diluted HCl, then water, sat. NaHCO3 and water again. After drying by MgSO4, ether was evaporated and the residue distilled in vacuo. Two distillations yielded 3.20 g (53 %) of the product, which consisted from the mixture of corresponding esters of 2-bromo and 2-chloropropionic acid, 6/1 (by NMR), b.p. 75-82 °C (1 torr). 1H-NMR, CDCl3, 200 MHz, : 4.28q (1H, J=7.0 Hz, CH); 1.83br q (6H, J=7.5 Hz, 3CH2); 1.77d (3H, J=7.0 Hz, CH3); 0.83t (9H, J=7.5 Hz, 3CH3). (1H-NMR of 3-ethylpent-3-yl 2-chloropropionate, CDCl3, 200 MHz, : 4.29q (1H, J=6.9 Hz, CH); 1.83br q (6H, J=7.5 Hz, 3CH2); 1.64d (3H, J=6.9 Hz, CH3); 0.82t (9H, J=7.5 Hz, 3CH3)).

*2-{N-tert-Butyl-N-[1-(diethoxy-phosphoryl)-2,2-dimethyl-propyl]-aminooxy}-propionic acid 3-ethylpent-3-yl ester* (**2a**). A solution of 0.589 g (2 mmol) of DEPN and 1.560 g (9 mmol) of PMDETA in 30 ml of acetone was bubbled by Ar within 30 min and transferred by syringe to a flask containing 1.309 g (9 mmol) of CuBr and 0.191 g (3 mmol) of Cu and purged by Ar. After the Cu complex was formed and the solution became homogeneous, 0.705 g (3 mmol) of 3-ethylpent-3-yl 2-bromopropionate were added by syringe. The mixture was stirred for 18 hr in Ar atmosphere at 50 – 55 °C. Thereafter, the mixture was diluted by 50 ml of a mixture of ether+pentane, 2/1; and precipitate of Cu complex was filtered off. The solution was passed though a small column of neutral alumina with ether + pentane, 1/1 as eluent. Evaporation of the solvents in high vacuum gave 0.870 g (97 %) of a yellow oil, which consisted mainly from targeted product (mixture of diastereomers, 44/56). Individual isomers were isolated by chromatography on silica gel with pentane / ether, 3/2 as eluent. The less stable diastereomer (but major from the synthesis) comes almost with the edge of the eluent. Diastereomer 1 (probably (R,R) and (S,S), more stable, second product from the column), colorless oil, 1H-NMR, CDCl3, 200 MHz,: 4.44q (1H, J=7.0 Hz, CH); 4.3 – 3.8m (4H, 2CH2O); 3.23d (1H, J=25.3 Hz, CH-P); 1.82br q (6H, J=7.6 Hz, 3CH2); 1.51d (3H, J=7.0 Hz, CH3); 1.27t (6H, J=7.1 Hz, 2CH3); 1.13s (9H, *t*Bu); 1.12 (9H, *t*Bu); 0.81t (9H, J=7.6 Hz, 3CH3). 13C-NMR, CDCl3, 75 MHz, : 173.03 (C=O); 88.90 (OCEt3); 83.30 (NO-C), 69.30d (C-P, 1JC-P = 138.0 Hz); 61.55d (OCH2, 2JC-P = 6.0 Hz); 61.46 (N-CMe3); 58.45d (OCH2, 2JC-P = 7.5 Hz); 35.35d (PCH*C*, 2JC-P = 4.5 Hz); 29.35d ((CH3)3CCHP, 3JC-P = 6.0 Hz); 27.84 ((CH3)3CN); 26.67 (C(*C*H2CH3)3); 20.01 (CH3); 16.35d (OCH2-CH3, 3JC-P = 6.0 Hz); 15.95d (OCH2CH3, 3JC-P = 6.8 Hz); 7.41 (C(CH2*C*H3)3). 31P-NMR, CDCl3, 121.6 MHz, : 24.5. Diastereomer 2 (probably (R,S) and (S,R), less stable, first product from the column), colorless oil, 1H-NMR, CDCl3, 200 MHz,: 4.64q (1H, J=6.9 Hz, CH); 4.26 – 3.82m (4H, 2CH2O); 3.33d (1H, J=26.0 Hz, CH-P); 1.79br q (6H, J=7.6 Hz, 3CH2); 1.48d (3H, J=6.9 Hz, CH3); 1.26t (3H, J=7.1 Hz, CH3); 1.22t (3H, J=7.0 Hz, CH3); 1.14s (9H, *t*Bu); 1.12 (9H, *t*Bu); 0.80t (9H, J=7.6 Hz, 3CH3). 13C-NMR, CDCl3, 75 MHz, : 171.40 (C=O); 88.6 3(O-CEt3); 75.40 (NO-C); 69.50d (C-P, 1JC-P = 138.0 Hz); 61.75d (OCH2, 2JC-P = 6.0 Hz); 61.21 (C-N); 58.85d (OCH2, 2JC-P = 7.5 Hz); 35.06 (*C*-CP, 2JP-C = 5.3 Hz); 30.25d ((*C*H3)3CCP, 3JC-P = 5.3 Hz); 27.85 ((*C*H3)3C); 26.71 (C(*C*H2CH3)3); 17.66 (OC*C*H3); 16.35d (OCH2*C*H3, 3JC-P = 5.3 Hz); 16.05 (OCH2*C*H3, 3JC-P = 6.8 Hz); 7.45 (C(CH2*C*H3)3). 31P-NMR, CDCl3, 121.6 MHz, : 23.9.

Synthesis of 2b

4-{*N*-tert-Butyl-*N*-[1-(diethoxyphosphoryl)-2,2-dimethylpropyl]aminooxy}-2,2-dimethylpentanedioic acid 1-ethyl ester 5-methyl ester (**2b**). A solution of 471 mg (2.72 mmol) of PMDETA and 224 mg (2.72 mmol) of methyl acrylate in 9 ml of acetone was bubbled by Ar within 20 min and transferred by syringe to a flask purged by Ar and containing 390 mg (2.72 mmol) of CuBr. After the Cu complex was formed and solution became homogeneous, a solution of 265 mg (1.36 mmol) of ethyl 2-bromoisobutyrate and 400 mg (1.36 mmol) of DEPN in 1 ml of acetone was added by syringe. The mixture was placed in an oil bath preheated at 50 °C and was stirred at this temperature for 17 hrs. Thereafter, the mixture was diluted by 40 ml of pentane; and precipitate of Cu complex was filtered off. The solution was concentrated to 10 ml and filtered again. Evaporation of the solvents in high vacuum (5×10-3 mbar within 1.5 hrs) gave 470 mg (70 %) of slightly yellow-green oil, which consisted mainly from the targeted product (ca. 80 % by NMR, diastereomeric ratio ca. 2 / 3). Chromatography on silica gel with pentane + ether, 3 / 1 gave ca. 100 mg of the minor diastereomer (purity ca. 60 % by NMR) and 165 mg of pure major diastereomer. We failed to isolate pure minor diastereomer. Diastereomer 1 (probably (R,R) and (S,S), more stable, second product from the column), colorless crystals, 1H-NMR, CDCl3, 600 MHz,: 4.51dd (1H, 3JH-H=12.2 Hz, 3.7 Hz, CH); 4.25 – 3.85m (6H, 3CH2O); 3.59s (3H, CH3O); 3.24d (1H, 2JH-P=25.8 Hz, CH-P); 2.48dd (1H, 2JH-H=14.0 Hz, 3JH-H=3.7 Hz, CH(H)); 2.18dd (1H, 2JH-H=14.0 Hz, 3JH-H=12.2 Hz, CH(H)); 1.27t (3H, 3JH-H=7.2 Hz, CH3); 1.25t (3H, 3JH-H=7.2 Hz, CH3); 1.19t (3H, 3JH-H=7.2 Hz, CH3); 1.19s (3H, CH3); 1.15s (3H, CH3); 1.12s (9H, tBu); 1.03 (9H, tBu). 13C-NMR, CDCl3, 151 MHz,: 176.95s (*C*O2C2H5); 173.18s (*C*O2CH3); 83.40s (CHON); 69.71d (1JC-P=139 Hz, C-P); 61.87d (2JC-P=6.8, CH2-OP); 61.61s ((CH3)3*C*N); 60.34s (*C*H2OCO); 58.75d (2JC-P=7.3, CH2-OP); 51.13s (CH3O); 41.42s (*C*H2CHCO2); 40.23s (*C*(CH3)2); 35.56d (2JC-P=5.2 Hz, (CH3)3*C*CN); 29.81d (3JC-P=6.3 Hz, (*C*H3)3CCN)); 28.32s (CH3); 27.92s ((*C*H3)3CN); 23.11s (CH3); 16.47d (3JC-P=6.3 Hz, *C*H3-CH2OP); 16.18 (3JC-P=6.8 Hz, *C*H3-CH2OP); 13.95s (*C*H3-CH2CO). 31P-NMR, CDCl3, 121.5 MHz,: 25.06. Diastereomer 2 (probably (R,S) and (S,R), less stable, first product from the column), 1H-NMR (crude mixture before chromatography), CDCl3, 200 MHz,: 4.48t (1H, 3J=8 Hz, CH); 4.32 – 3.8m (6H, 3CH2O); 3.60s (3H, CH3O); 3.33d (1H, J=27.0 Hz, CH-P); 2.24m (2H, CH2); 1.26t (3H, J=7 Hz, CH3); 1.25t (3H, J=7 Hz, CH3); 1.24t (3H, J=7 Hz, CH3); 1.18s (3H, CH3); 1.16s (3H, CH3); 1.15s (9H, tBu); 1.10 (9H, tBu). 31P-NMR, CDCl3, 121.5 MHz,: 24.69.

Synthesis of 2c

*sec-Butyl 2-bromoisobutyrate* was synthesized by esterification of 2-bromoisobutyric acid by *sec*-butanol in toluene with catalytic amount of sulfuric acid.

*2-{N-tert-Butyl-N-[1-(diethoxy-phosphoryl)-2,2-dimethyl-propyl]-aminooxy}-2-methyl-propionic acid sec-butyl ester* (**2c**). A solution of 295 mg (1 mmol) of DEPN and 520 mg (3 mmol) of PMDETA in 20 ml of acetone was bubbled by Ar within 30 min and transferred by syringe to a flask purged by Ar and containing 430 mg (3 mmol) of CuBr and 65 mg (1 mmol) of Cu. After the Cu complex was formed and the solution became homogeneous, 335 mg (1.5 mmol) of *sec*-butyl 2-bromoisobutyrate were added by syringe. The mixture was stirred for 20 min in Ar atmosphere at room temperature. Thereafter, the mixture was diluted by 80 ml of a mixture of pentane + ether, 2/1; and precipitate of Cu complex was filtered off. The solution was concentrated to 10 ml and filtered again. Evaporation of the solvents in high vacuum (5×10-3 mbar within 1.5 hrs) gave 330 mg (75 %) of slightly yellow oil, which consisted mainly from targeted product (90 % by NMR). Purification by flash chromatography on silica gel with pentane + ether, 2/1 as eluent gave the targeted product as colorless oil consisted of two diastereomers with the ratio ca. 1.2/1. 1H-NMR, CDCl3, 600 MHz,: 4.83sept (isomer 1) and 4.81sept (isomer 2) (1H, 3JH-H=6.3 Hz, CH-O); 4.42-4.27m (2H, CH2O); 4.08-3.88m (2H, CH2O); 3.25d (isomer 1) and 3.24d (isomer 2) (1H, J=25.8 Hz, CH-P); 1.70s (isomer 1) and 1.69s (isomer 2) (3H, CH3); 1.56s (isomer 1) and 1.55s (isomer 2) (3H, CH3); 1.66-1.48m (2H, C*H*2-CHO); 1.28t (isomer 1) and 1.27t (isomer 2) (6H, 3JH-H=7.1 Hz, 2C*H*3-CH2O); 1.20d (isomer 1) and 1.16d (isomer 2) (3H, 3JH-H=6.5 Hz, C*H*3-CH); 1.18s (9H, *t*Bu); 1.08s (isomer 2) and 1.07s (isomer 1) (9H, *t*Bu); 0.90t (isomer 2) and 0.86t (isomer 1) (3H, 3JH-H=7.4 Hz, CH3). 13C-NMR, CDCl3, 151 MHz,: 174.78 and 174.70 (CO); 84.02 (isomer 1) and 83.85 (isomer 2) (*C*-ON); 72.80 (isomer 2) and 72.56 (isomer 1) (CH-O); 69.95d (isomer 2) and 69.89d (isomer 1) (1JC-P=138 Hz, C-P); 62.06 (isomer 2) and 62.02 (isomer 1) ((CH3)3*C*N); 61.64d (isomer 2) and 61.59d (isomer 1) (2JC-P=6.8 Hz, CH2-OP); 58.51d (2JC-P=7.9 Hz, CH2-OP, both isomers); 35.93 (isomer 1) and 35.88 (isomer 2) ((CH3)3*C*CN); 30.00d (3JC-P=6.0 Hz, (*C*H3)3CCN) both isomers); 28.93 (isomer 1) and 28.79 (isomer 2) (NOC-*C*H3); 28.74 (isomer 1) and 28.54 (isomer 2) (CH2-CHO); 28.01 ((*C*H3)3CN both isomers); 21.85 (isomer 2) and 21.69 (isomer 1) (NOC-*C*H3); 19.28 (isomer 1) and 19.02 (isomer 2) (*C*H3-CHO); 16.46d (3JC-P=6.0 Hz, *C*H3-CH2COP, both isomers); 16.12d (3JC-P=6.8 Hz, *C*H3-CH2COP, both isomers); 9.71 and 9.50 (OCHCH2-*C*H3). 31P-NMR, CDCl3, 243 MHz,: 25.89 (isomer 2) and 25.87 (isomer 1).

Synthesis of 3

*2-{N-tert-Butyl-N-[1-(diethoxy-phosphoryl)-2,2-dimethyl-propyl]-aminooxy}-2-methyl-propionic acid tert-butyl ester* (**3**) was synthesized from *tert*-butyl 2-bromoisobutyrate in a similar manner as described for **2a**. Yield 70 %. 1H-NMR, CDCl3, 300 MHz,: 4.50-3.85m (4H, CH2O); 3.28d (1H, J=27.0 Hz, CH-P); 1.67s (3H, CH3); 1.55s (3H, CH3); 1.44s (9H, (C*H*3)3C-O); 1.35-1.25br (6H, 2C*H*3-CH2O); 1.20s (9H, *t*Bu); 1.12s (9H, *t*Bu). 13C-NMR, CDCl3, 75 MHz,: 174.40 (CO); 84.40 (O-*C*(CH3)3); 80.80 (*C*(CH3)2); 69.90d (1JC-P=135 Hz, C-P); 62.00 ((CH3)3*C*N); 61.65d (2JC-P=6.0 Hz, CH2-OP); 58.62d (2JC-P=7.5 Hz, CH2-OP); 36.00d (2JC-P=6.0 Hz, *C*(CH3)3); 30.13d (3JC-P=6.0 Hz, (*C*H3)3CCN)); 28.77 (NOC-*C*H3); 28.20 ((*C*H3)3CN); 27.9 (O-C(*C*H3)3); 22.00 (NOC-*C*H3); 16.64d (3JC-P=4.3 Hz, *C*H3-CH2COP); 16.27d (3JC-P=6.8 Hz, *C*H3-CH2COP). 31P NMR, CDCl3, 121.6 MHz, : 25.50.

References for supporting information

1 J. Cason, K. L. Runehart, Jr. and S. D. Thornton, *J. Org. Chem.,* 1953, **18**, 1594.

2 B. E. Woodworth, X. Zhang, Z. Metzner, S. G. Gaynor and K. Matyjaszewski, *Macromolecules*, 1998, **31**, 5955.

3 A. J. Parker, G. Biale, D. Cook, D. J. Lloyd, I. D. R. Stevens, J. Takahashi and S. Winstein, *J. Am. Chem. Soc.*, 1971, **93**, 4735.

4 O. Brunner, *Monatsh. Chem.*, 1954, **85**, 918.
